# Supplementary material for: A Validation Study of the Web-Based Physical Activity Questionnaire Active-Q Against the GENEA Accelerometer
Source: PubMed Central journal article supplement (PMC4527001; doi:10.2196/resprot.3896), 2015-07-16
Supplement: resprot_v4i3e86_app1.pdf [file resprot_v4i3e86_app1.pdf]

**Follow-up questions regarding means of transportation.****Selected activities in the previous screening question are presented to the respondent.**

How often do you get to your daily occupation in the following ways and approximately how long does it take?

|                                 | Number of days per week                                                                                                                                                                                                                                                      | Time, one way per day                                                                                                                                                                                                                                                                                                                     |
|---------------------------------|------------------------------------------------------------------------------------------------------------------------------------------------------------------------------------------------------------------------------------------------------------------------------|-------------------------------------------------------------------------------------------------------------------------------------------------------------------------------------------------------------------------------------------------------------------------------------------------------------------------------------------|
| Walking                         | <input type="radio"/> 1<br><input type="radio"/> 2<br><input type="radio"/> 3<br><input type="radio"/> 4<br><input type="radio"/> 5<br><input type="radio"/> 6<br><input type="radio"/> 7<br><input type="radio"/> Don't know<br><input type="radio"/> Don't want to answer  | <input type="radio"/> Less than 15 minutes<br><input type="radio"/> 15 - 29 minutes<br><input type="radio"/> 30 - 44 minutes<br><input type="radio"/> 45 - 59 minutes<br><input type="radio"/> 1 - 2 hours<br><input type="radio"/> Longer than 2 hours<br><input type="radio"/> Don't know<br><input type="radio"/> Don't want to answer |
| Cycling                         | <input type="radio"/> 1<br><input type="radio"/> 2<br><input type="radio"/> 3<br><input type="radio"/> 4<br><input type="radio"/> 5<br><input type="radio"/> 6<br><input type="radio"/> 7<br><input type="radio"/> Don't know<br><input type="radio"/> Don't want to answer  | <input type="radio"/> Less than 15 minutes<br><input type="radio"/> 15 - 29 minutes<br><input type="radio"/> 30 - 44 minutes<br><input type="radio"/> 45 - 59 minutes<br><input type="radio"/> 1 - 2 hours<br><input type="radio"/> Longer than 2 hours<br><input type="radio"/> Don't know<br><input type="radio"/> Don't want to answer |
| By motorcycle, moped or scooter | <input type="radio"/> 1<br><input type="radio"/> 2<br><input type="radio"/> 3<br><input type="radio"/> 4<br><input type="radio"/> 5<br><input type="radio"/> 6<br><input type="radio"/> 7<br><input type="radio"/> Don't know<br><input type="radio"/> Don't want to answer) | <input type="radio"/> Less than 15 minutes<br><input type="radio"/> 15 - 29 minutes<br><input type="radio"/> 30 - 44 minutes<br><input type="radio"/> 45 - 59 minutes<br><input type="radio"/> 1 - 2 hours<br><input type="radio"/> Longer than 2 hours<br><input type="radio"/> Don't know<br><input type="radio"/> Don't want to answer |
| By car or taxi                  | <input type="radio"/> 1<br><input type="radio"/> 2<br><input type="radio"/> 3<br><input type="radio"/> 4<br><input type="radio"/> 5<br><input type="radio"/> 6<br><input type="radio"/> 7<br><input type="radio"/> Don't know<br><input type="radio"/> Don't want to answer  | <input type="radio"/> Less than 15 minutes<br><input type="radio"/> 15 - 29 minutes<br><input type="radio"/> 30 - 44 minutes<br><input type="radio"/> 45 - 59 minutes<br><input type="radio"/> 1 - 2 hours<br><input type="radio"/> Longer than 2 hours<br><input type="radio"/> Don't know<br><input type="radio"/> Don't want to answer |
| By bus, train, subway or boat   | <input type="radio"/> 1<br><input type="radio"/> 2<br><input type="radio"/> 3<br><input type="radio"/> 4                                                                                                                                                                     | <input type="radio"/> Less than 15 minutes<br><input type="radio"/> 15 - 29 minutes<br><input type="radio"/> 30 - 44 minutes<br><input type="radio"/> 45 - 59 minutes                                                                                                                                                                     |

|       | Number of days per week                                                                                                                                                                                                                                                     | Time, one way per day                                                                                                                                                                                                                                                                                                                     |
|-------|-----------------------------------------------------------------------------------------------------------------------------------------------------------------------------------------------------------------------------------------------------------------------------|-------------------------------------------------------------------------------------------------------------------------------------------------------------------------------------------------------------------------------------------------------------------------------------------------------------------------------------------|
|       | <input type="radio"/> 5<br><input type="radio"/> 6<br><input type="radio"/> 7<br><input type="radio"/> Don't know<br><input type="radio"/> Don't want to answer                                                                                                             | <input type="radio"/> 1 - 2 hours<br><input type="radio"/> Longer than 2 hours<br><input type="radio"/> Don't know<br><input type="radio"/> Don't want to answer                                                                                                                                                                          |
| Other | <input type="radio"/> 1<br><input type="radio"/> 2<br><input type="radio"/> 3<br><input type="radio"/> 4<br><input type="radio"/> 5<br><input type="radio"/> 6<br><input type="radio"/> 7<br><input type="radio"/> Don't know<br><input type="radio"/> Don't want to answer | <input type="radio"/> Less than 15 minutes<br><input type="radio"/> 15 - 29 minutes<br><input type="radio"/> 30 - 44 minutes<br><input type="radio"/> 45 - 59 minutes<br><input type="radio"/> 1 - 2 hours<br><input type="radio"/> Longer than 2 hours<br><input type="radio"/> Don't know<br><input type="radio"/> Don't want to answer |

### Leisure time activities

Which of the following activities do you engage in at least once per week in your leisure time?  
Mark all activities applicable.

- |                                                                                                                |                                                                                                        |
|----------------------------------------------------------------------------------------------------------------|--------------------------------------------------------------------------------------------------------|
| <input type="checkbox"/> Watching TV/DVDs etc.                                                                 | <input type="checkbox"/> Dancing                                                                       |
| <input type="checkbox"/> Using the computer, reading e-mails, playing computer games, play station, X-box etc. | <input type="checkbox"/> Walking, Nordic walking, walking a dog (not as transport to daily occupation) |
| <input type="checkbox"/> Sitting reading, writing, sewing etc.                                                 | <input type="checkbox"/> Bicycling (not as transport to daily occupation)                              |
| <input type="checkbox"/> Playing a musical instrument or active computer games (e.g. Wii)                      | <input type="checkbox"/> Other                                                                         |
| <input type="checkbox"/> Doing household chores (e.g. cleaning, laundry, child care, gardening etc.)           | <input type="radio"/> None of the above                                                                |
| <input type="checkbox"/> Shopping or other errands                                                             | <input type="radio"/> Don't know                                                                       |
|                                                                                                                | <input type="radio"/> Don't want to answer                                                             |

### Follow-up questions regarding leisure time activities.

**Selected activities in the previous screening question are presented to the respondent.**

How many days per week do you dedicate time to the following leisure time activities and how much time do you spend per day on the activity?

|                       | Number of days per week                                                                                                                                                                                                                                                     | Total time per day                                                                                                                                                                                                                                                                                                             |
|-----------------------|-----------------------------------------------------------------------------------------------------------------------------------------------------------------------------------------------------------------------------------------------------------------------------|--------------------------------------------------------------------------------------------------------------------------------------------------------------------------------------------------------------------------------------------------------------------------------------------------------------------------------|
| Watching TV/DVDs etc. | <input type="radio"/> 1<br><input type="radio"/> 2<br><input type="radio"/> 3<br><input type="radio"/> 4<br><input type="radio"/> 5<br><input type="radio"/> 6<br><input type="radio"/> 7<br><input type="radio"/> Don't know<br><input type="radio"/> Don't want to answer | <input type="radio"/> Less than 30 minutes<br><input type="radio"/> 30-59 minutes<br><input type="radio"/> 60-119 minutes<br><input type="radio"/> 2-4 hours<br><input type="radio"/> 5-8 hours<br><input type="radio"/> Longer than 8 hours<br><input type="radio"/> Don't know<br><input type="radio"/> Don't want to answer |

|                                                                                       | Number of days per week                                                                                                                                                                                                                                                     | Total time per day                                                                                                                                                                                                                                                                                                             |
|---------------------------------------------------------------------------------------|-----------------------------------------------------------------------------------------------------------------------------------------------------------------------------------------------------------------------------------------------------------------------------|--------------------------------------------------------------------------------------------------------------------------------------------------------------------------------------------------------------------------------------------------------------------------------------------------------------------------------|
| Using the computer, reading e-mails, playing computer games, play station, X-box etc. | <input type="radio"/> 1<br><input type="radio"/> 2<br><input type="radio"/> 3<br><input type="radio"/> 4<br><input type="radio"/> 5<br><input type="radio"/> 6<br><input type="radio"/> 7<br><input type="radio"/> Don't know<br><input type="radio"/> Don't want to answer | <input type="radio"/> Less than 30 minutes<br><input type="radio"/> 30-59 minutes<br><input type="radio"/> 60-119 minutes<br><input type="radio"/> 2-4 hours<br><input type="radio"/> 5-8 hours<br><input type="radio"/> Longer than 8 hours<br><input type="radio"/> Don't know<br><input type="radio"/> Don't want to answer |
| Sitting reading, writing, sewing etc.                                                 | <input type="radio"/> 1<br><input type="radio"/> 2<br><input type="radio"/> 3<br><input type="radio"/> 4<br><input type="radio"/> 5<br><input type="radio"/> 6<br><input type="radio"/> 7<br><input type="radio"/> Don't know<br><input type="radio"/> Don't want to answer | <input type="radio"/> Less than 30 minutes<br><input type="radio"/> 30-59 minutes<br><input type="radio"/> 60-119 minutes<br><input type="radio"/> 2-4 hours<br><input type="radio"/> 5-8 hours<br><input type="radio"/> Longer than 8 hours<br><input type="radio"/> Don't know<br><input type="radio"/> Don't want to answer |
| Playing a musical instrument or active computer games (e.g. Wii)                      | <input type="radio"/> 1<br><input type="radio"/> 2<br><input type="radio"/> 3<br><input type="radio"/> 4<br><input type="radio"/> 5<br><input type="radio"/> 6<br><input type="radio"/> 7<br><input type="radio"/> Don't know<br><input type="radio"/> Don't want to answer | <input type="radio"/> Less than 30 minutes<br><input type="radio"/> 30-59 minutes<br><input type="radio"/> 60-119 minutes<br><input type="radio"/> 2-4 hours<br><input type="radio"/> 5-8 hours<br><input type="radio"/> Longer than 8 hours<br><input type="radio"/> Don't know<br><input type="radio"/> Don't want to answer |
| Doing household chores (e.g. cleaning, laundry, child care, gardening etc.)           | <input type="radio"/> 1<br><input type="radio"/> 2<br><input type="radio"/> 3<br><input type="radio"/> 4<br><input type="radio"/> 5<br><input type="radio"/> 6<br><input type="radio"/> 7<br><input type="radio"/> Don't know<br><input type="radio"/> Don't want to answer | <input type="radio"/> Less than 30 minutes<br><input type="radio"/> 30-59 minutes<br><input type="radio"/> 60-119 minutes<br><input type="radio"/> 2-4 hours<br><input type="radio"/> 5-8 hours<br><input type="radio"/> Longer than 8 hours<br><input type="radio"/> Don't know<br><input type="radio"/> Don't want to answer |
| Shopping or other errands                                                             | <input type="radio"/> 1<br><input type="radio"/> 2<br><input type="radio"/> 3<br><input type="radio"/> 4<br><input type="radio"/> 5<br><input type="radio"/> 6<br><input type="radio"/> 7<br><input type="radio"/> Don't know<br><input type="radio"/> Don't want to answer | <input type="radio"/> Less than 30 minutes<br><input type="radio"/> 30-59 minutes<br><input type="radio"/> 60-119 minutes<br><input type="radio"/> 2-4 hours<br><input type="radio"/> 5-8 hours<br><input type="radio"/> Longer than 8 hours<br><input type="radio"/> Don't know<br><input type="radio"/> Don't want to answer |

|                                                                                  | Number of days per week                                                                                                                                                                                                                                                     | Total time per day                                                                                                                                                                                                                                                                                                                |
|----------------------------------------------------------------------------------|-----------------------------------------------------------------------------------------------------------------------------------------------------------------------------------------------------------------------------------------------------------------------------|-----------------------------------------------------------------------------------------------------------------------------------------------------------------------------------------------------------------------------------------------------------------------------------------------------------------------------------|
| Dancing                                                                          | <input type="radio"/> 1<br><input type="radio"/> 2<br><input type="radio"/> 3<br><input type="radio"/> 4<br><input type="radio"/> 5<br><input type="radio"/> 6<br><input type="radio"/> 7<br><input type="radio"/> Don't know<br><input type="radio"/> Don't want to answer | <input type="radio"/> Less than 30 minutes<br><input type="radio"/> 30-59 minutes<br><input type="radio"/> 60-119 minutes<br><input type="radio"/> 2-4 hours<br><input type="radio"/> 5-8 hours<br><input type="radio"/> Longer than 8 hours<br><input type="radio"/> Don't know<br><input type="radio"/> Don't want to answer    |
| Walking, Nordic walking, walking a dog<br>(not as transport to daily occupation) | <input type="radio"/> 1<br><input type="radio"/> 2<br><input type="radio"/> 3<br><input type="radio"/> 4<br><input type="radio"/> 5<br><input type="radio"/> 6<br><input type="radio"/> 7<br><input type="radio"/> Don't know<br><input type="radio"/> Don't want to answer | <input type="radio"/> Less than 15 minutes<br><input type="radio"/> 15-29 minutes<br><input type="radio"/> 30-44 minutes<br><input type="radio"/> 45-59 minutes<br><input type="radio"/> 1-2 hours<br><input type="radio"/> Longer than 2 hours<br><input type="radio"/> Don't know<br><input type="radio"/> Don't want to answer |
| Bicycling (not as transport to daily occupation)                                 | <input type="radio"/> 1<br><input type="radio"/> 2<br><input type="radio"/> 3<br><input type="radio"/> 4<br><input type="radio"/> 5<br><input type="radio"/> 6<br><input type="radio"/> 7<br><input type="radio"/> Don't know<br><input type="radio"/> Don't want to answer | <input type="radio"/> Less than 15 minutes<br><input type="radio"/> 15-29 minutes<br><input type="radio"/> 30-44 minutes<br><input type="radio"/> 45-59 minutes<br><input type="radio"/> 1-2 hours<br><input type="radio"/> Longer than 2 hours<br><input type="radio"/> Don't know<br><input type="radio"/> Don't want to answer |

### Overall sporting activity or exercise

Do you exercise or participate in any sporting activities regularly?

- Yes       Don't know  
 No       Don't want to answer

### Sporting activities

What kind of exercise or sports activities do you participate in? If your type of activity is not included in the list below, please choose the most similar one.

- |                                                                               |                                                               |
|-------------------------------------------------------------------------------|---------------------------------------------------------------|
| <input type="checkbox"/> Aerobics or cardio fitness class                     | <input type="checkbox"/> Martial arts (e.g. judo or karate)   |
| <input type="checkbox"/> Weight lifting                                       | <input type="checkbox"/> Boxing or wrestling                  |
| <input type="checkbox"/> Jogging, running or orienteering                     | <input type="checkbox"/> Yoga, Pilates or Tai chi             |
| <input type="checkbox"/> Athletics, (e.g. high jump, long jump or three-step) | <input type="checkbox"/> Tennis, badminton or table tennis    |
| <input type="checkbox"/> Spinning or cycling in demanding terrain             | <input type="checkbox"/> Squash                               |
| <input type="checkbox"/> Swimming                                             | <input type="checkbox"/> Sailing, surfing, canoeing or rowing |

- |                                                                                                 |                                                         |
|-------------------------------------------------------------------------------------------------|---------------------------------------------------------|
| <input type="checkbox"/> Ball sports in team (e.g. soccer, basketball, volleyball or floorball) | <input type="checkbox"/> Motor sports (e.g. motorcross) |
| <input type="checkbox"/> Golf                                                                   | <input type="checkbox"/> Rock climbing                  |
| <input type="checkbox"/> Dance class or competitive dancing                                     | <input type="checkbox"/> Other                          |
| <input type="checkbox"/> Horseback riding                                                       | <input type="radio"/> None of these                     |
| <input type="checkbox"/> Ice skating, ice hockey or bandy                                       | <input type="radio"/> Don't know                        |
| <input type="checkbox"/> Skiing downhill or cross country                                       | <input type="radio"/> Don't want to answer              |

### Follow-up questions regarding regular sporting activities.

Selected activities in the previous screening question are presented to the respondent.

How often do you participate in the following sports or the following activities and for how long each time?

|                                                      | Number of times                                                                                                                                                                                                                                                                                      | Time per session                                                                                                                                                                                                                                                                                |
|------------------------------------------------------|------------------------------------------------------------------------------------------------------------------------------------------------------------------------------------------------------------------------------------------------------------------------------------------------------|-------------------------------------------------------------------------------------------------------------------------------------------------------------------------------------------------------------------------------------------------------------------------------------------------|
| Aerobics or cardio fitness class                     | <input type="radio"/> 1 - 3 times a month<br><input type="radio"/> Once a week<br><input type="radio"/> 2 - 3 times a week<br><input type="radio"/> 4 - 5 times a week<br><input type="radio"/> 6 - 7 times a week<br><input type="radio"/> Don't know<br><input type="radio"/> Don't want to answer | <input type="radio"/> Less than 30 minutes<br><input type="radio"/> 30 - 59 minutes<br><input type="radio"/> 60 - 119 minutes<br><input type="radio"/> 2 - 4 hours<br><input type="radio"/> More than 4 hours<br><input type="radio"/> Don't know<br><input type="radio"/> Don't want to answer |
| Weight lifting                                       | <input type="radio"/> 1 - 3 times a month<br><input type="radio"/> Once a week<br><input type="radio"/> 2 - 3 times a week<br><input type="radio"/> 4 - 5 times a week<br><input type="radio"/> 6 - 7 times a week<br><input type="radio"/> Don't know<br><input type="radio"/> Don't want to answer | <input type="radio"/> Less than 30 minutes<br><input type="radio"/> 30 - 59 minutes<br><input type="radio"/> 60 - 119 minutes<br><input type="radio"/> 2 - 4 hours<br><input type="radio"/> More than 4 hours<br><input type="radio"/> Don't know<br><input type="radio"/> Don't want to answer |
| Jogging, running or orienteering                     | <input type="radio"/> 1 - 3 times a month<br><input type="radio"/> Once a week<br><input type="radio"/> 2 - 3 times a week<br><input type="radio"/> 4 - 5 times a week<br><input type="radio"/> 6 - 7 times a week<br><input type="radio"/> Don't know<br><input type="radio"/> Don't want to answer | <input type="radio"/> Less than 30 minutes<br><input type="radio"/> 30 - 59 minutes<br><input type="radio"/> 60 - 119 minutes<br><input type="radio"/> 2 - 4 hours<br><input type="radio"/> More than 4 hours<br><input type="radio"/> Don't know<br><input type="radio"/> Don't want to answer |
| Athletics, (e.g. high jump, long jump or three-step) | <input type="radio"/> 1 - 3 times a month<br><input type="radio"/> Once a week<br><input type="radio"/> 2 - 3 times a week<br><input type="radio"/> 4 - 5 times a week<br><input type="radio"/> 6 - 7 times a week<br><input type="radio"/> Don't know<br><input type="radio"/> Don't want to answer | <input type="radio"/> Less than 30 minutes<br><input type="radio"/> 30 - 59 minutes<br><input type="radio"/> 60 - 119 minutes<br><input type="radio"/> 2 - 4 hours<br><input type="radio"/> More than 4 hours<br><input type="radio"/> Don't know<br><input type="radio"/> Don't want to answer |
| Spinning or cycling in demanding terrain             | <input type="radio"/> 1 - 3 times a month<br><input type="radio"/> Once a week<br><input type="radio"/> 2 - 3 times a week                                                                                                                                                                           | <input type="radio"/> Less than 30 minutes<br><input type="radio"/> 30 - 59 minutes<br><input type="radio"/> 60 - 119 minutes                                                                                                                                                                   |

|                                                                        | Number of times                                                                                                                                                                                                                                                                                      | Time per session                                                                                                                                                                                                                                                                                |
|------------------------------------------------------------------------|------------------------------------------------------------------------------------------------------------------------------------------------------------------------------------------------------------------------------------------------------------------------------------------------------|-------------------------------------------------------------------------------------------------------------------------------------------------------------------------------------------------------------------------------------------------------------------------------------------------|
|                                                                        | <input type="radio"/> 4 - 5 times a week<br><input type="radio"/> 6 - 7 times a week<br><input type="radio"/> Don't know<br><input type="radio"/> Don't want to answer                                                                                                                               | <input type="radio"/> 2 - 4 hours<br><input type="radio"/> More than 4 hours<br><input type="radio"/> Don't know<br><input type="radio"/> Don't want to answer                                                                                                                                  |
| Swimming                                                               | <input type="radio"/> 1 - 3 times a month<br><input type="radio"/> Once a week<br><input type="radio"/> 2 - 3 times a week<br><input type="radio"/> 4 - 5 times a week<br><input type="radio"/> 6 - 7 times a week<br><input type="radio"/> Don't know<br><input type="radio"/> Don't want to answer | <input type="radio"/> Less than 30 minutes<br><input type="radio"/> 30 - 59 minutes<br><input type="radio"/> 60 - 119 minutes<br><input type="radio"/> 2 - 4 hours<br><input type="radio"/> More than 4 hours<br><input type="radio"/> Don't know<br><input type="radio"/> Don't want to answer |
| Ball sports in team (e.g. soccer, basketball, volleyball or floorball) | <input type="radio"/> 1 - 3 times a month<br><input type="radio"/> Once a week<br><input type="radio"/> 2 - 3 times a week<br><input type="radio"/> 4 - 5 times a week<br><input type="radio"/> 6 - 7 times a week<br><input type="radio"/> Don't know<br><input type="radio"/> Don't want to answer | <input type="radio"/> Less than 30 minutes<br><input type="radio"/> 30 - 59 minutes<br><input type="radio"/> 60 - 119 minutes<br><input type="radio"/> 2 - 4 hours<br><input type="radio"/> More than 4 hours<br><input type="radio"/> Don't know<br><input type="radio"/> Don't want to answer |
| Golf                                                                   | <input type="radio"/> 1 - 3 times a month<br><input type="radio"/> Once a week<br><input type="radio"/> 2 - 3 times a week<br><input type="radio"/> 4 - 5 times a week<br><input type="radio"/> 6 - 7 times a week<br><input type="radio"/> Don't know<br><input type="radio"/> Don't want to answer | <input type="radio"/> Less than 30 minutes<br><input type="radio"/> 30 - 59 minutes<br><input type="radio"/> 60 - 119 minutes<br><input type="radio"/> 2 - 4 hours<br><input type="radio"/> More than 4 hours<br><input type="radio"/> Don't know<br><input type="radio"/> Don't want to answer |
| Dance class or competitive dancing                                     | <input type="radio"/> 1 - 3 times a month<br><input type="radio"/> Once a week<br><input type="radio"/> 2 - 3 times a week<br><input type="radio"/> 4 - 5 times a week<br><input type="radio"/> 6 - 7 times a week<br><input type="radio"/> Don't know<br><input type="radio"/> Don't want to answer | <input type="radio"/> Less than 30 minutes<br><input type="radio"/> 30 - 59 minutes<br><input type="radio"/> 60 - 119 minutes<br><input type="radio"/> 2 - 4 hours<br><input type="radio"/> More than 4 hours<br><input type="radio"/> Don't know<br><input type="radio"/> Don't want to answer |
| Horseback riding                                                       | <input type="radio"/> 1 - 3 times a month<br><input type="radio"/> Once a week<br><input type="radio"/> 2 - 3 times a week<br><input type="radio"/> 4 - 5 times a week<br><input type="radio"/> 6 - 7 times a week<br><input type="radio"/> Don't know<br><input type="radio"/> Don't want to answer | <input type="radio"/> Less than 30 minutes<br><input type="radio"/> 30 - 59 minutes<br><input type="radio"/> 60 - 119 minutes<br><input type="radio"/> 2 - 4 hours<br><input type="radio"/> More than 4 hours<br><input type="radio"/> Don't know<br><input type="radio"/> Don't want to answer |
| Ice skating, ice hockey or bandy                                       | <input type="radio"/> 1 - 3 times a month<br><input type="radio"/> Once a week<br><input type="radio"/> 2 - 3 times a week<br><input type="radio"/> 4 - 5 times a week<br><input type="radio"/> 6 - 7 times a week<br><input type="radio"/> Don't know                                               | <input type="radio"/> Less than 30 minutes<br><input type="radio"/> 30 - 59 minutes<br><input type="radio"/> 60 - 119 minutes<br><input type="radio"/> 2 - 4 hours<br><input type="radio"/> More than 4 hours<br><input type="radio"/> Don't know                                               |

|                                      | Number of times                                                                                                                                                                                                                                                                                      | Time per session                                                                                                                                                                                                                                                                                 |
|--------------------------------------|------------------------------------------------------------------------------------------------------------------------------------------------------------------------------------------------------------------------------------------------------------------------------------------------------|--------------------------------------------------------------------------------------------------------------------------------------------------------------------------------------------------------------------------------------------------------------------------------------------------|
|                                      | <input type="radio"/> Don't want to answer                                                                                                                                                                                                                                                           | <input type="radio"/> Don't want to answer                                                                                                                                                                                                                                                       |
| Skiing downhill or cross country     | <input type="radio"/> 1 - 3 times a month<br><input type="radio"/> Once a week<br><input type="radio"/> 2 - 3 times a week<br><input type="radio"/> 4 - 5 times a week<br><input type="radio"/> 6 - 7 times a week<br><input type="radio"/> Don't know<br><input type="radio"/> Don't want to answer | <input type="radio"/> Less than 30 minutes<br><input type="radio"/> 30 - 59 minutes<br><input type="radio"/> 60 - 119 minutes<br><input type="radio"/> 2 - 4 hours<br><input type="radio"/> More than 4 hours<br><input type="radio"/> Don't know<br><input type="radio"/> Don't want to answer  |
| Martial arts (e.g. judo or karate)   | <input type="radio"/> 1 - 3 times a month<br><input type="radio"/> Once a week<br><input type="radio"/> 2 - 3 times a week<br><input type="radio"/> 4 - 5 times a week<br><input type="radio"/> 6 - 7 times a week<br><input type="radio"/> Don't know<br><input type="radio"/> Don't want to answer | <input type="radio"/> Less than 30 minutes<br><input type="radio"/> 30 - 59 minutes<br><input type="radio"/> 60 - 119 minutes<br><input type="radio"/> 2 - 4 hours<br><input type="radio"/> More than 4 hours<br><input type="radio"/> Don't know<br><input type="radio"/> Don't want to answer  |
| Boxing or wrestling                  | <input type="radio"/> 1 - 3 times a month<br><input type="radio"/> Once a week<br><input type="radio"/> 2 - 3 times a week<br><input type="radio"/> 4 - 5 times a week<br><input type="radio"/> 6 - 7 times a week<br><input type="radio"/> Don't know<br><input type="radio"/> Don't want to answer | <input type="radio"/> Less than 30 minutes<br><input type="radio"/> 30 - 59 minutes<br><input type="radio"/> 60 - 119 minutes<br><input type="radio"/> 2 - 4 hours<br><input type="radio"/> More than 4 hours<br><input type="radio"/> Don't know<br><input type="radio"/> Don't want to answer  |
| Yoga, Pilates or Tai chi             | <input type="radio"/> 1 - 3 times a month<br><input type="radio"/> Once a week<br><input type="radio"/> 2 - 3 times a week<br><input type="radio"/> 4 - 5 times a week<br><input type="radio"/> 6 - 7 times a week<br><input type="radio"/> Don't know<br><input type="radio"/> Don't want to answer | <input type="radio"/> Less than 30 minutes<br><input type="radio"/> 30 - 59 minutes<br><input type="radio"/> 60 - 119 minutes<br><input type="radio"/> 2 - 4 hours<br><input type="radio"/> More than 4 hours<br><input type="radio"/> Don't know<br><input type="radio"/> Don't want to answer) |
| Tennis, badminton or table tennis    | <input type="radio"/> 1 - 3 times a month<br><input type="radio"/> Once a week<br><input type="radio"/> 2 - 3 times a week<br><input type="radio"/> 4 - 5 times a week<br><input type="radio"/> 6 - 7 times a week<br><input type="radio"/> Don't know<br><input type="radio"/> Don't want to answer | <input type="radio"/> Less than 30 minutes<br><input type="radio"/> 30 - 59 minutes<br><input type="radio"/> 60 - 119 minutes<br><input type="radio"/> 2 - 4 hours<br><input type="radio"/> More than 4 hours<br><input type="radio"/> Don't know<br><input type="radio"/> Don't want to answer  |
| Squash                               | <input type="radio"/> 1 - 3 times a month<br><input type="radio"/> Once a week<br><input type="radio"/> 2 - 3 times a week<br><input type="radio"/> 4 - 5 times a week<br><input type="radio"/> 6 - 7 times a week<br><input type="radio"/> Don't know<br><input type="radio"/> Don't want to answer | <input type="radio"/> Less than 30 minutes<br><input type="radio"/> 30 - 59 minutes<br><input type="radio"/> 60 - 119 minutes<br><input type="radio"/> 2 - 4 hours<br><input type="radio"/> More than 4 hours<br><input type="radio"/> Don't know<br><input type="radio"/> Don't want to answer  |
| Sailing, surfing, canoeing or rowing | <input type="radio"/> 1 - 3 times a month<br><input type="radio"/> Once a week                                                                                                                                                                                                                       | <input type="radio"/> Less than 30 minutes<br><input type="radio"/> 30 - 59 minutes                                                                                                                                                                                                              |



|                                | Number of times                                                                                                                                                                                                                                                                                      | Time per session                                                                                                                                                                                                                                                                                |
|--------------------------------|------------------------------------------------------------------------------------------------------------------------------------------------------------------------------------------------------------------------------------------------------------------------------------------------------|-------------------------------------------------------------------------------------------------------------------------------------------------------------------------------------------------------------------------------------------------------------------------------------------------|
|                                | <input type="radio"/> 2 - 3 times a week<br><input type="radio"/> 4 - 5 times a week<br><input type="radio"/> 6 - 7 times a week<br><input type="radio"/> Don't know<br><input type="radio"/> Don't want to answer                                                                                   | <input type="radio"/> 60 - 119 minutes<br><input type="radio"/> 2 - 4 hours<br><input type="radio"/> More than 4 hours<br><input type="radio"/> Don't know<br><input type="radio"/> Don't want to answer                                                                                        |
| Motor sports (e.g. motorcross) | <input type="radio"/> 1 - 3 times a month<br><input type="radio"/> Once a week<br><input type="radio"/> 2 - 3 times a week<br><input type="radio"/> 4 - 5 times a week<br><input type="radio"/> 6 - 7 times a week<br><input type="radio"/> Don't know<br><input type="radio"/> Don't want to answer | <input type="radio"/> Less than 30 minutes<br><input type="radio"/> 30 - 59 minutes<br><input type="radio"/> 60 - 119 minutes<br><input type="radio"/> 2 - 4 hours<br><input type="radio"/> More than 4 hours<br><input type="radio"/> Don't know<br><input type="radio"/> Don't want to answer |
| Rock climbing                  | <input type="radio"/> 1 - 3 times a month<br><input type="radio"/> Once a week<br><input type="radio"/> 2 - 3 times a week<br><input type="radio"/> 4 - 5 times a week<br><input type="radio"/> 6 - 7 times a week<br><input type="radio"/> Don't know<br><input type="radio"/> Don't want to answer | <input type="radio"/> Less than 30 minutes<br><input type="radio"/> 30 - 59 minutes<br><input type="radio"/> 60 - 119 minutes<br><input type="radio"/> 2 - 4 hours<br><input type="radio"/> More than 4 hours<br><input type="radio"/> Don't know<br><input type="radio"/> Don't want to answer |

**Competing**

Do you compete regularly in a sport? Follow-up question if respondent reported regular physical activity.

- Yes                       Don't know  
 No                             Don't want to answer

**Sleep**

How many hours do you normally sleep per night?

- Less than 5 hours             9 hours  
 6 hours                         10 hours or more  
 7 hours                         Don't know  
 8 hours                         Don't want to answer
